# Supplementary material for: Spectroscopic and magnetic investigations of a spin-frustrated Mn-doped CoAl2O4 spinel
Source: Royal Society of Chemistry journal article supplement (doi:10.1039/c8cp07140c), 2018-12-07
Supplement: c8cp07140c1.pdf [file c8cp07140c1.pdf]

## **Supporting Information**

### **Spectroscopic and Magnetic Investigations of Spin-frustrated Mn-doped $\text{CoAl}_2\text{O}_4$ Spinel**

Suman Kalyan Pradhan, Biswajit Dalal, Ankita Sarkar and Subodh Kumar De<sup>\*</sup>

*School of Materials Sciences, Indian Association for the Cultivation of Science, Jadavpur,  
Kolkata 700032, India*

\*E-mail: [msskd@iacs.res.in](mailto:msskd@iacs.res.in)

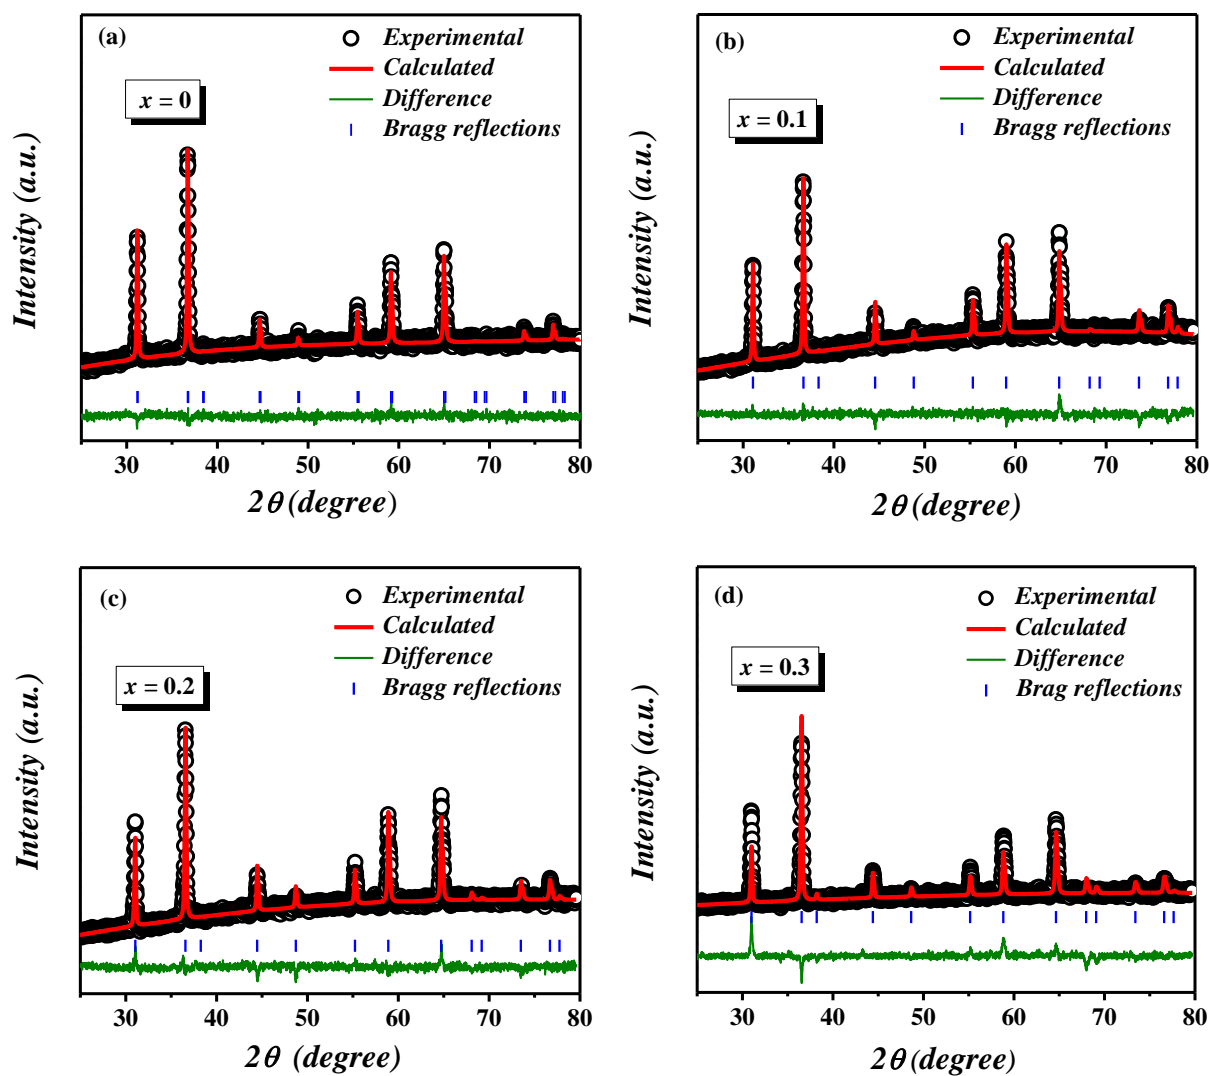

**Fig.S1** Room temperature Rietveld fitted x-ray diffraction patterns for  $x =$  (a) 0, (b) 0.1, (c) 0.2, and (d) 0.3 samples of  $\text{Co}_{1-x}\text{Mn}_x\text{Al}_2\text{O}_4$ . Structural parameters obtained from the Rietveld refinements are shown in Table S1 in the supplemental material.

**Table S1** Structural parameters obtained from Rietveld refinements of the room temperature x-ray diffraction pattern of  $\text{Co}_{1-x}\text{Mn}_x\text{Al}_2\text{O}_4$  (Space group:  $Fd\bar{3}m$ ) ( $\alpha = \beta = \gamma = 90^\circ$ ). The errors are given in the parentheses.

(a)  $x = 0$ ;  $a = b = c = 8.1162(4)$  Å;  $R_{wp} = 3.8$ ;  $R_p = 2.7$ ;  $\chi^2 = 1.18$ ;  $\alpha = 0.0804(2)$

| Atom     | x         | y         | z         | Occupancy |
|----------|-----------|-----------|-----------|-----------|
| Co (8a)  | 1/8       | 1/8       | 1/8       | 0.9196(3) |
| Al (8a)  | 1/8       | 1/8       | 1/8       | 0.0804(2) |
| Al (16d) | 1/2       | 1/2       | 1/2       | 0.9598(9) |
| Co (16d) | 1/2       | 1/2       | 1/2       | 0.0402(1) |
| O (32e)  | 0.2620(1) | 0.2620(1) | 0.2620(1) | 1.000     |

(b)  $x = 0.1$ ;  $a = b = c = 8.1272(3)$  Å;  $R_{wp} = 2.71$ ;  $R_p = 2.09$ ;  $\chi^2 = 1.15$ ;  $\alpha = 0.0780(4)$

| Atom     | x         | y         | z         | Occupancy |
|----------|-----------|-----------|-----------|-----------|
| Co (8a)  | 1/8       | 1/8       | 1/8       | 0.8318(7) |
| Al (8a)  | 1/8       | 1/8       | 1/8       | 0.0780(4) |
| Mn (8a)  | 1/8       | 1/8       | 1/8       | 0.0902(1) |
| Al (16d) | 1/2       | 1/2       | 1/2       | 0.9561(1) |
| Co (16d) | 1/2       | 1/2       | 1/2       | 0.0390(2) |
| Mn (16d) | 1/2       | 1/2       | 1/2       | 0.0049(7) |
| O (32e)  | 0.2626(3) | 0.2626(3) | 0.2626(3) | 1.000     |

(c)  $x = 0.2$ ;  $a = b = c = 8.1392(3)$  Å;  $R_{wp} = 3.12$ ;  $R_p = 2.30$ ;  $\chi^2 = 1.27$ ;  $\alpha = 0.0762(2)$

| Atom     | x         | y         | z         | Occupancy |
|----------|-----------|-----------|-----------|-----------|
| Co (8a)  | 1/8       | 1/8       | 1/8       | 0.7434(5) |
| Al (8a)  | 1/8       | 1/8       | 1/8       | 0.0762(2) |
| Mn (8a)  | 1/8       | 1/8       | 1/8       | 0.1804(2) |
| Al (16d) | 1/2       | 1/2       | 1/2       | 0.9521(1) |
| Co (16d) | 1/2       | 1/2       | 1/2       | 0.0381(3) |
| Mn (16d) | 1/2       | 1/2       | 1/2       | 0.0098(9) |
| O(32e)   | 0.2629(5) | 0.2629(5) | 0.2629(5) | 1.000     |

(d)  $x = 0.3$ ;  $a = b = c = 8.1481(6)$  Å;  $R_{wp} = 4.30$ ;  $R_p = 2.91$ ;  $\chi^2 = 1.60$ ;  $\alpha = 0.0742(3)$

| Atom     | x         | y         | z         | Occupancy |
|----------|-----------|-----------|-----------|-----------|
| Co (8a)  | 1/8       | 1/8       | 1/8       | 0.6758(6) |
| Al (8a)  | 1/8       | 1/8       | 1/8       | 0.0742(3) |
| Mn(8a)   | 1/8       | 1/8       | 1/8       | 0.2500(1) |
| Al(16d)  | 1/2       | 1/2       | 1/2       | 0.9379(6) |
| Co(16d)  | 1/2       | 1/2       | 1/2       | 0.0371(2) |
| Mn (16d) | 1/2       | 1/2       | 1/2       | 0.0250(2) |
| O(32e)   | 0.2630(2) | 0.2630(2) | 0.2630(2) | 1.000     |

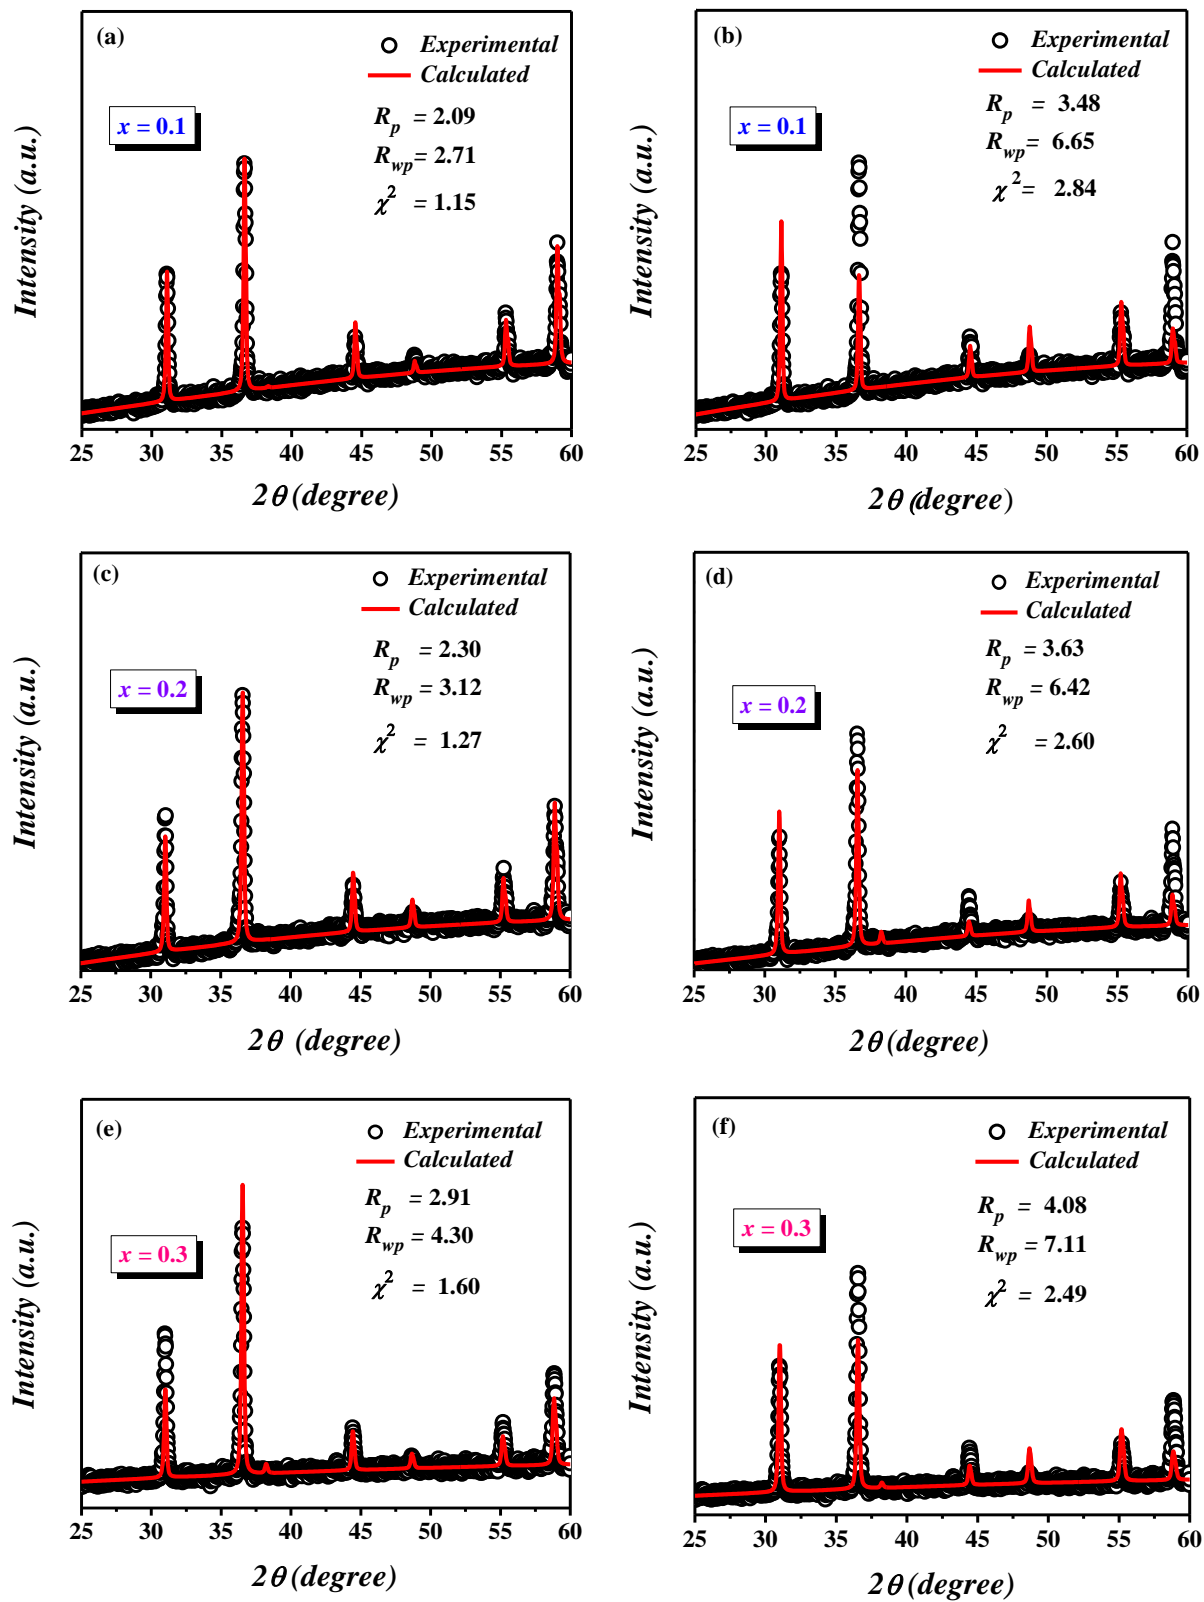

**Fig. S2** Room-temperature Rietveld fitted XRD patterns considering different distributions of the  $\text{Mn}^{2+}$  and  $\text{Co}^{2+}$  over the two types of sites for (a-b)  $x = 0.1$ , (c-d)  $x = 0.2$ , and (e-f)  $x = 0.3$ .

**Table S2** The values of  $\chi^2$  of Mn-doped  $\text{CoAl}_2\text{O}_4$  samples for different distributions of  $\text{Mn}^{2+}$  and  $\text{Co}^{2+}$  over the two types of sites.

|           | $\chi^2$    | Atom      | Co (8a)   | Al (8a)   | Mn (8a)   | Al (16d)  | Co(16d)   | Mn (16d)  |
|-----------|-------------|-----------|-----------|-----------|-----------|-----------|-----------|-----------|
| $x = 0.1$ | (a)<br>1.15 | Occupancy | 0.8318(7) | 0.0780(4) | 0.0902(1) | 0.9561(1) | 0.0390(2) | 0.0049(7) |
|           | (b)<br>2.84 |           | 0.8538(7) | 0.0760(2) | 0.0702(4) | 0.9471(2) | 0.0380(1) | 0.0149(8) |
| $x = 0.2$ | (c)<br>1.27 | Occupancy | 0.7434(5) | 0.0762(2) | 0.1804(2) | 0.9521(1) | 0.0381(3) | 0.0098(9) |
|           | (d)<br>2.60 |           | 0.7776(8) | 0.0720(3) | 0.1504(2) | 0.9392(3) | 0.0360(2) | 0.0248(9) |
| $x = 0.3$ | (e)<br>1.60 | Occupancy | 0.6758(6) | 0.0742(3) | 0.2500(1) | 0.9379(6) | 0.0371(2) | 0.0250(2) |
|           | (f)<br>2.49 |           | 0.6594(5) | 0.0704(3) | 0.2702(4) | 0.950(1)  | 0.0352(1) | 0.0148(9) |

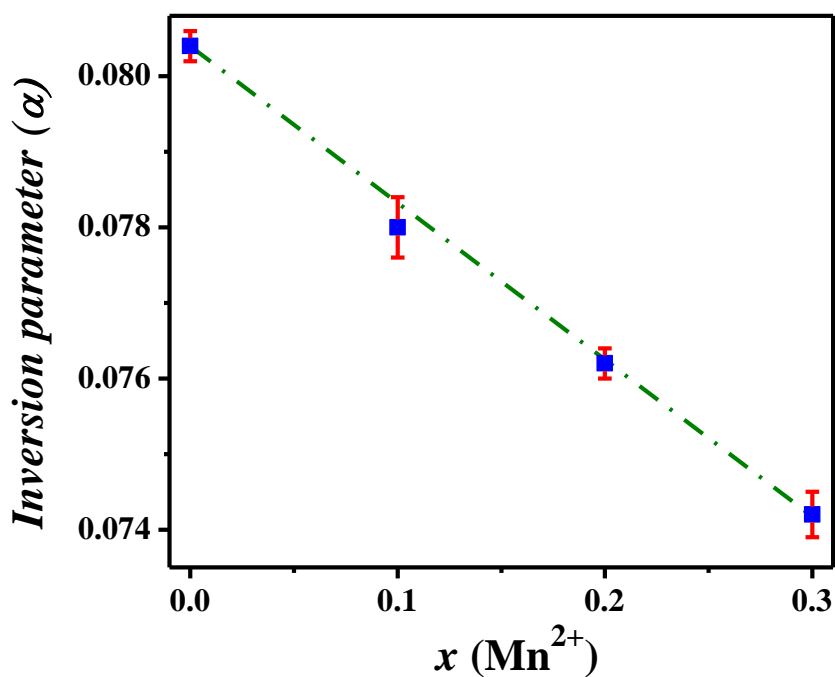

**Fig. S3** Variation of *Inversion parameter* ( $\alpha$ ) with the compositions, as obtained from the Rietveld analysis of the best-fitted XRD patterns.

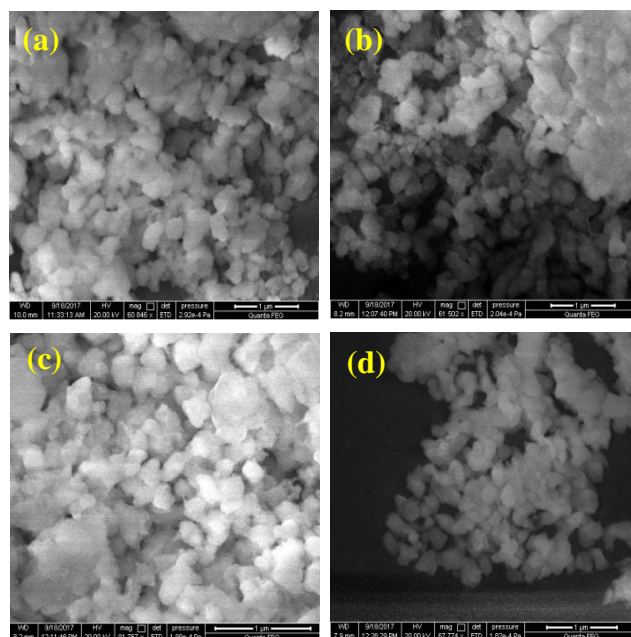

**Fig. S4** SEM micrographs of  $\text{Co}_{1-x}\text{Mn}_x\text{Al}_2\text{O}_4$  (a)  $x = 0$ , (b)  $x = 0.1$ , (c)  $x = 0.2$  and (d)  $x = 0.3$ .

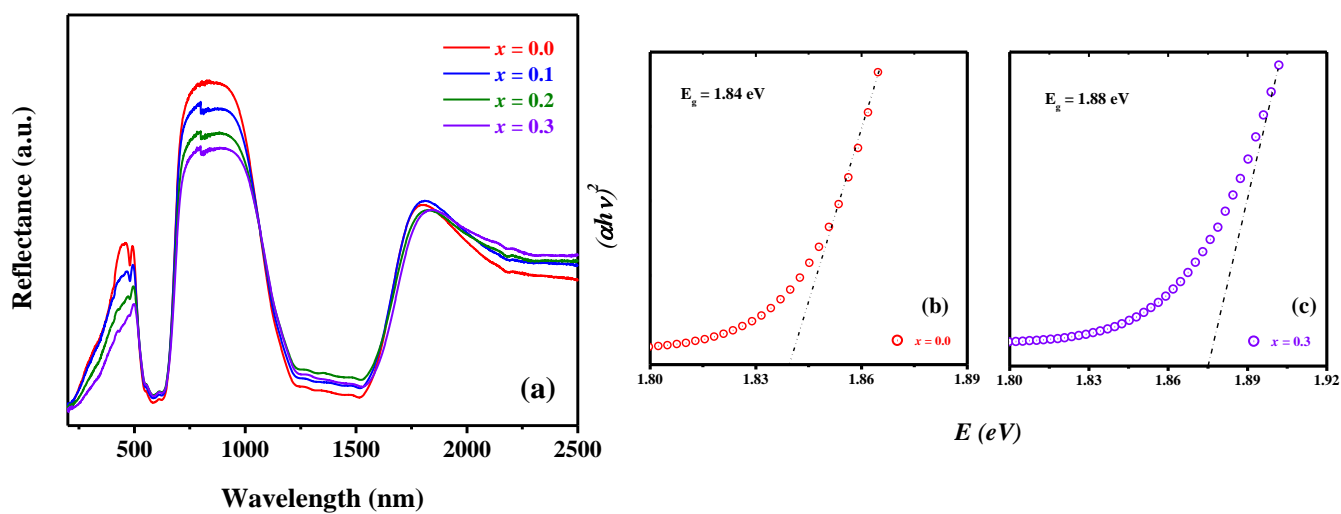

**Fig. S5** (a) Room temperature Reflectance spectra for  $\text{Co}_{1-x}\text{Mn}_x\text{Al}_2\text{O}_4$ . Tauc plots  $[(\alpha h\nu)^2 \text{ vs. photon energy } (E)]$  for (b)  $x = 0$  and (c)  $x = 0.3$ .

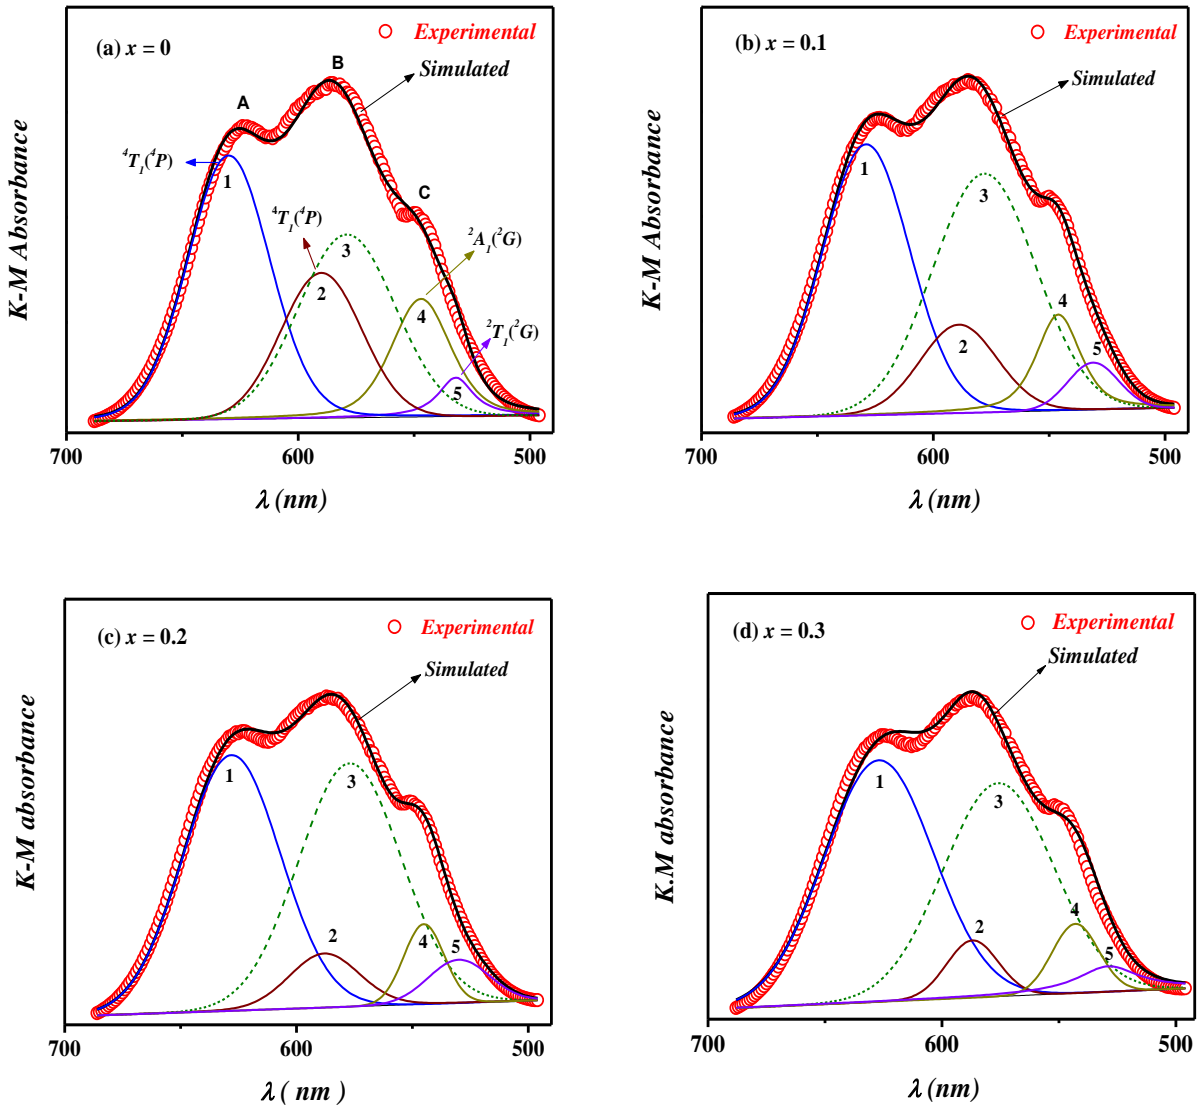

**Fig. S6** De-convoluted UV spectrum of  $\text{Co}_{1-x}\text{Mn}_x\text{Al}_2\text{O}_4$  where (a)  $x = 0$ , (b)  $x = 0.1$ , (c)  $x = 0.2$  and (d)  $x = 0.3$ .

**Table S3** De-convoluted peak position obtained from room temperature UV spectrum of  $\text{Co}_{1-x}\text{Mn}_x\text{Al}_2\text{O}_4$ .

| Sample    | Peak Position (nm) | Intensity (%) |
|-----------|--------------------|---------------|--------------------|---------------|--------------------|---------------|--------------------|---------------|--------------------|---------------|
|           | 1                  |               | 2                  |               | 3                  |               | 4                  |               | 5                  |               |
| $x = 0$   | 630                | 36            | 590                | 18            | 579                | 28            | 547                | 13            | 532                | 3.12          |
| $x = 0.1$ | 629                | 38            | 589                | 11            | 578                | 38            | 546                | 8             | 531                | 3.66          |
| $x = 0.2$ | 628                | 42            | 588                | 6             | 577                | 42            | 543                | 5.31          | 530                | 4.25          |
| $x = 0.3$ | 627                | 45            | 586                | 5             | 576                | 40            | 543                | 5.46          | 528                | 4.09          |
